# Supplementary material for: Establishment of a Drug Screening Model for Cardiac Complications of Acute Renal Failure
Source: Biomolecules. 2021 Sep 16;11(9):1370. doi: 10.3390/biom11091370 (PMC8469377; doi:10.3390/biom11091370)
Supplement: Supplementary file 1 [file biomolecules-11-01370-s001.zip]

Archive with 5 entries (5 files):
- Supplementary materials.pdf
- Video S1.mp4
- Video S2.mp4
- Video S3.mp4
- Video S4.mp4
